# Supplementary material for: Results of the phase I CCTG IND.231 trial of CX-5461 in patients with advanced solid tumors enriched for DNA-repair deficiencies
Source: PubMed Central journal article supplement (PMC9232501; doi:10.1038/s41467-022-31199-2), 2022-06-24
Supplement: 41467_2022_31199_MOESM1_ESM.pdf [file 41467_2022_31199_MOESM1_ESM.pdf]

## Supplementary Figures and Tables

### Supplementary Figure 1. UVA radiation increased double-stranded DNA breaks and ROS.

**(a)** g-H2AX intensity was synergistically increased with the combination of CX-5461 and UVA radiation. Representative pictures of g-H2AX immunofluorescent staining with and without UVA radiation, for control, CX5461  $10^{-8}$ M, CX5461  $5 \times 10^{-8}$ M, PDS  $20 \times 10^{-6}$ M, representative images from 30 fields per condition, quantified in **(b)** Quantile and mean intensity of g-H2AX level per cell, vertical axis. UV and drug factor conditions, horizontal axis. Experiments were repeated two times (biological duplicates) and similar results were obtained. Number of cells as in Figure 5g **(c)** The ratio of ROS level measured after UVA irradiation versus before UVA irradiation was calculated. Biological triplicates. The horizontal bar = median. \*\*\* $P < 0.0001$ , Welch's t-test;  $n = 8$

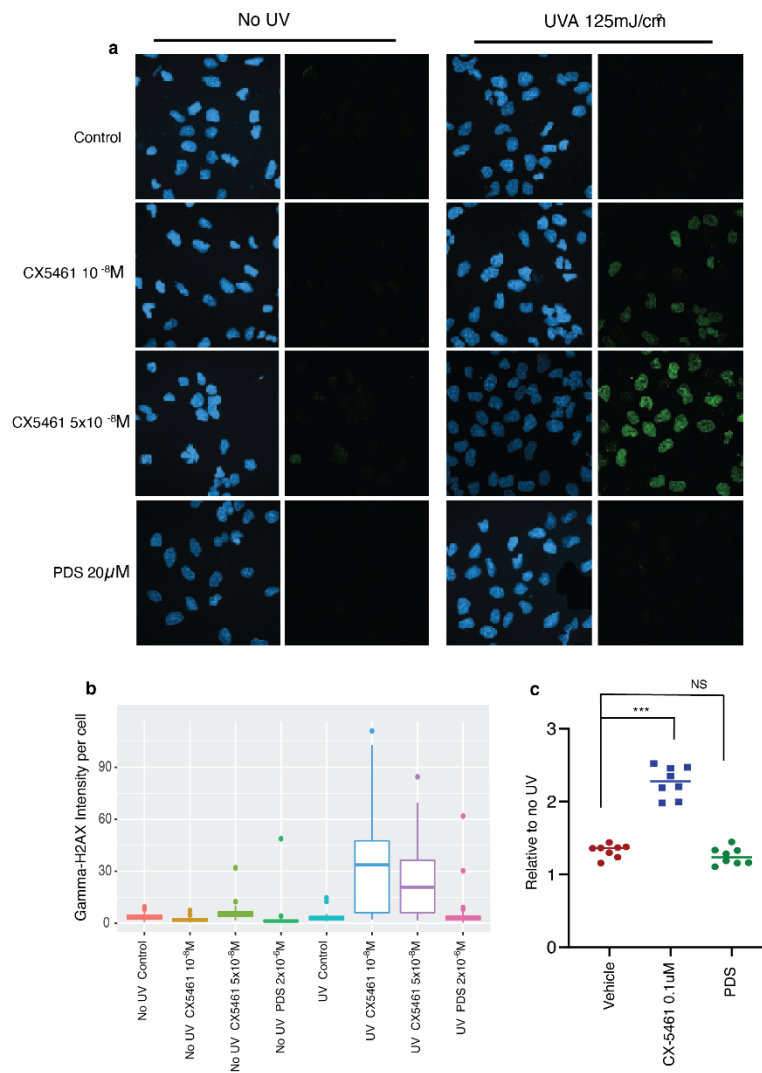

Supplementary Figure



**Supplementary Table 2:** Supplemental response information. 36 patients were fully evaluable for response (1 patient was not treated, and 4 patients were not reassessed)

| Best Response               | All treated patients<br>N=40 |                                               | BRCA1 / 2 or PALB2<br>germline or somatic<br>mutations |                                               | BRCA1 / 2, PALB2 pr<br>TP53 germline or<br>somatic mutations |                                                  | All treated patients<br>N=40        |                                            |
|-----------------------------|------------------------------|-----------------------------------------------|--------------------------------------------------------|-----------------------------------------------|--------------------------------------------------------------|--------------------------------------------------|-------------------------------------|--------------------------------------------|
|                             | N<br>patients                | Response<br>Duration Mo.<br>Median<br>(range) | N<br>patients                                          | Response<br>Duration<br>Mo. Median<br>(range) | N<br>patients                                                | Response<br>Duration<br>Mo.<br>Median<br>(range) | Prior<br>Platinum N<br>(%)<br>N= 32 | Prior<br>PARP<br>Inhibitor N<br>(%)<br>N=8 |
| Complete<br>Response (CR)   | 0                            |                                               |                                                        |                                               |                                                              |                                                  |                                     |                                            |
| Partial<br>Response (PR)    | 4                            | 6.5 ( 5.5-<br>8.2)                            | 3                                                      | 6.3 (5.5-6.8)                                 | 4                                                            | 6.5 (5.5-8.2)                                    | 2                                   |                                            |
| Stable Disease<br>(SD)      | 11                           | 3.6 ( 2.3-<br>10.9)                           | 7                                                      | 3.5 (3-9.2)                                   | 7                                                            | 3.5 (3-9.2)                                      | 8                                   | 1                                          |
| Progressive<br>Disease (PD) | 21                           |                                               | 12                                                     |                                               | 15                                                           |                                                  | 18                                  | 6                                          |
| Inevaluable                 | 4                            |                                               | 3                                                      |                                               | 3                                                            |                                                  | 4                                   | 1                                          |

**Supplementary Table 3.** Schedule for collection of CX5461 pharmacokinetics

| Cycle and Day          | Time                                            |
|------------------------|-------------------------------------------------|
| C1D1                   | Pre-infusion                                    |
|                        | During infusion at 30 minutes                   |
|                        | Immediately post infusion then:                 |
|                        | 30 minutes post infusion                        |
|                        | 1 hour post infusion                            |
|                        | 2 hours post infusion                           |
|                        | 4 hours post infusion                           |
| 6 hours post infusion* |                                                 |
| C1D2                   | 24 hours post infusion                          |
| C1D3                   | 48 hours post infusion                          |
| C1D4                   | 72 hours post infusion                          |
| C1D8                   | Pre-infusion                                    |
| C1D15                  | Pre-infusion                                    |
|                        | During infusion at 30 minutes                   |
|                        | Immediately post infusion then                  |
|                        | 30 minutes post infusion                        |
|                        | 1 hour post infusion                            |
|                        | 2 hours post infusion                           |
|                        | 4 hours post infusion                           |
| 6 hours post infusion* |                                                 |
| C1D16                  | 24 hours post infusion                          |
| C1D17-19               | single sample: 48-96 hours after C1D15 infusion |
| C2D1                   | Pre-infusion                                    |
| * May be 6-8 hours.    |                                                 |

In addition to the specific time points listed above, additional samples were to be collected from consenting patients with unusual or severe toxicity, or initial PK results suggest unusual PK or exposure.
